1 Do below-ground genotypes influence above-ground  
2 microbiomes of grafted tomato plants?

3

4 Hirokazu Toju<sup>1,2\*</sup>, Koji Okayasu<sup>3</sup> and Michitaka Notaguchi<sup>2,3</sup>

5

6 <sup>1</sup>Center for Ecological Research, Kyoto University, Otsu, Shiga 520-2133, Japan

7 <sup>2</sup>Precursory Research for Embryonic Science and Technology (PRESTO), Japan Science and  
8 Technology Agency, Kawaguchi, Saitama 332-0012, Japan

9 <sup>3</sup>Graduate School of Bioagricultural Sciences, Nagoya University, Furo-cho, Chikusa-ku,  
10 Nagoya, Aichi, 464-8601 Japan

11

12 **\*Correspondence:** Hirokazu Toju (toju.hirokazu.4c@kyoto-u.ac.jp).

13

14 This article includes 3 Figures, 4 Tables, 1 Supplementary Figures, and 5 Supplementary  
15 Data.

16 Running head: Grafting and microbiomes

17

18 bioRxiv accession: xxxx

19

20 **Abstract.**

21 Bacteria and fungi form complex communities (microbiomes) in the phyllosphere and  
22 rhizosphere of plants, contributing to hosts' growth and survival in various ways. Recent  
23 studies have suggested that host plant genotypes control, at least partly, microbial community  
24 compositions in the phyllosphere. However, we still have limited knowledge of how  
25 microbiome structures are determined in/on grafted crop plants, whose above-ground (scion)  
26 and below-ground (rootstock) genotypes are different with each other. By using eight  
27 varieties of grafted tomato plants, we examined how rootstock genotypes determine  
28 phyllosphere microbial assembly in field conditions. An Illumina sequencing analysis showed  
29 that both bacterial and fungal community structures did not significantly differ among tomato  
30 plants with different rootstock genotypes. Nonetheless, a further statistical analysis targeting  
31 respective microbial taxa suggested that some bacteria and fungi were preferentially  
32 associated with particular rootstock treatments. Specifically, a bacterium in the genus  
33 *Deinococcus* was found disproportionately from ungrafted tomato individuals. In addition,  
34 yeasts in the genus *Hannaella* were preferentially associated with the tomato individuals  
35 whose rootstock genotype was "Ganbarune". Overall, this study suggests to what extent  
36 phyllosphere microbiome structures can be affected/unaffected by rootstock genotypes in  
37 grafted crop plants.

38

39 **Keywords:** *Cladosporium*; *Dioszegia*; forestry; *Methylobacterium*; microbe–microbe  
40 interactions; *Moesziomyces*; plant–microbe interactions; *Pseudomonas*; *Sphingomonas*;  
41 sustainable agriculture

42

## 43 INTRODUCTION

44 In both natural and agricultural ecosystems, bacteria and fungi in diverse taxonomic groups  
45 are associated with plants, positively and/or negatively influencing the survival and growth of  
46 their hosts (Vorholt 2012; Mendes et al. 2013; Bai et al. 2015; Peay et al. 2016). An  
47 increasing number of studies have shown that plant-associated microbes not only improve  
48 nutritional conditions of host plants but also increase plants' resistance to abiotic stresses (e.g.,  
49 high temperature, drought, and soil pollution) and that to pathogens and pests (Arnold et al.  
50 2003; Mendes et al. 2011; Vandenkoornhuysen et al. 2015; Busby et al. 2017). In contrast,  
51 bacterial and fungal communities associated with plants can be regarded as serious risk  
52 factors in agriculture and forestry because they are occasionally dominated by plant  
53 pathogenic species or strains (Anderson et al. 2004; Callaway 2016). Therefore, controlling  
54 plant-associated microbiomes has been recognized as a major challenge towards the  
55 development of stable and sustainable management of crop fields and plantations (Schlaeppli  
56 & Bulgarelli 2015; Agler et al. 2016; Vorholt et al. 2017; Toju et al. 2018).

57 Host plant genotypes are among the most important factors determining microbiome  
58 structures (Whipps et al. 2008; Bodenhausen et al. 2014; Bulgarelli et al. 2015; Edwards et al.  
59 2015). Developing disease-resistant crop plant varieties has been one of the major goals in  
60 breeding science (Collard & Mackill 2008; Dodds & Rathjen 2010; Dean et al. 2012).  
61 Moreover, recent studies have explored genes and mutations influencing whole microbiome  
62 structures (Hiruma et al. 2016; Castrillo et al. 2017), providing a basis for optimizing  
63 communities of plant-growth-promoting bacteria and/or fungi. Meanwhile, to gain more  
64 insights into mechanisms by which plant microbiomes are controlled, studies using plant  
65 individuals with complex genetic backgrounds have been awaited. Specifically, by using  
66 grafted plants, whose above- and below-ground genotypes are different with each other, we  
67 will be able to examine, for instance, how below-ground genetic factors control above-ground  
68 microbiome structures. Because root genotypes can control not only uptake of water and  
69 nutrients but also transport of phytohormones or signaling molecules (Goldschmidt 2014;  
70 Notaguchi & Okamoto 2015; Takahashi et al. 2018), their effects on leaf physiology  
71 potentially influence community compositions of endophytic and epiphytic microbes in the

72 phyllosphere. Although studies focusing on such mechanisms interlinking above- and  
73 below-ground processes can provide essential insights into plants' microbiome control, few  
74 attempts (Liu et al. 2018), to our knowledge, have been made to conduct experiments using  
75 grafted plants.

76 Grafting *per se* is a classic technique but it has been increasingly considered as a  
77 promising method for increasing yield, crop quality, abiotic stress resistance, and pathogen  
78 resistance of various plants (e.g., tomato, melon, grapevine, apple, and citrus) in agriculture  
79 (Khah et al. 2006; Martinez-Rodriguez et al. 2008; Flores et al. 2010; Rivard et al. 2012;  
80 Warschefsky et al. 2016). In general, performance of grafted plants depends greatly on  
81 compatibility between scion and rootstock genotypes (Ruiz & Romero 1999;  
82 Martinez-Ballesta et al. 2010; Schwarz et al. 2010). However, we still have limited  
83 knowledge of how scion–rootstock genotypic combinations determine microbiome structures  
84 in the phyllosphere and rhizosphere (Liu et al. 2018). Moreover, although some pioneering  
85 studies have investigated microbial community compositions of grafted plants (Ling et al.  
86 2015; Song et al. 2015; Marasco et al. 2018), most of them focused on subsets of  
87 microbiomes (i.e., either bacteria or fungi but not both). Therefore, new lines of studies  
88 examining relationships between scion/rootstock genotypes and whole microbiome structures  
89 in roots/leaves have been awaited.

90 In this study, we evaluated how below-ground genotypes of plants determine bacterial  
91 and fungal community structures in/on leaves under field conditions. After growing grafted  
92 tomato [*Solanum lycopersicum* (= *Lycopersicon lycopersicum*)] individuals in a field  
93 experiment, we analyzed the leaf microbial community compositions of the sampled tomatoes  
94 based on Illumina sequencing. The contributions of below-ground genotypes on the  
95 microbiome structures were then evaluated by comparing the microbial community datasets  
96 of eight tomato rootstock varieties. We also performed randomization-based statistical  
97 analyses to explore bacterial and fungal taxa that had strong signs of preferences for specific  
98 tomato rootstock varieties. Overall, this study suggests to what extent below-ground  
99 genotypes of plants influence above-ground plant–microbe interactions, providing a basis for  
100 managing microbiomes of grafted plants in agriculture and forestry.

101

## 102 **MATERIALS AND METHODS**

### 103 **Grafted Tomato Seedlings**

104 To prepare rootstocks, seeds of eight tomato varieties (“Chibikko”, “Ganbarune”, “M82”,  
105 “Micro-Tom”, “Regina”, “Spike”, “Triper”, and “Momotaro-Haruka”) were sown in 6-cm  
106 pots filled with potting soil on June 7, 2017 for “Momotaro-Haruka” and June 1, 2017 for the  
107 others, and then the pots were grown in a greenhouse of Togo Field, Nagoya University,  
108 Nagoya, Japan (35.112 °N; 137.083 °E). On June 22–23, seedlings for the field experiment  
109 detailed below were produced by grafting “Momotaro-Haruka” scions on each of the eight  
110 varieties of rootstocks: i.e., above-ground parts of the grafted seedlings were all  
111 Momotaro-Haruka, while below-ground parts differed among seedling individuals. Ungrafted  
112 “Momotaro-Haruka” seedlings were also prepared as control samples. The grafted (including  
113 Momotaro-Haruka/Momotaro-Haruka self-grafted seedlings) and ungrafted seedlings (in total,  
114 nine treatments) were grown in a greenhouse of Togo Field and, on July 7, they were  
115 transported to Center for Ecological Research, Kyoto University, Kyoto, Japan (34.972 °N;  
116 135.958 °E). Each seedling was then transferred to a 9-cm pot filled with  
117 commercially-available culture soil (Rakuyo Co., Ltd.) on the day and they were kept on the  
118 field nursery shelf of Center for Ecological Research until the field experiment.

119

### 120 **Field Transplantation**

121 On July 13, base fertilizer was provided to the soil in the experimental field of Center for  
122 Ecological Research (N = 13.6 g/m<sup>2</sup>; P<sub>2</sub>O<sub>5</sub> = 13.6 g/m<sup>2</sup>; K<sub>2</sub>O = 13.6 g/m<sup>2</sup>). On July 25, the  
123 abovementioned seedlings (ca. 50 cm high) were transplanted to the open field at 50 cm  
124 horizontal intervals in three lines in a randomized order (9 seedling treatment × 5 replicates  
125 per line × 3 lines (sets) = 135 individuals; Fig. 1). The tomato individuals were watered twice  
126 (morning and evening) every day. On September 13, a ca. 1-cm<sup>2</sup> disc of a mature leaf was  
127 sampled from each tomato individual and placed in a 2-mL microtube. The leaf samples were

128 transferred to a laboratory of Center for Ecological Research using a cool box and they were  
129 then preserved at -80 °C in a freezer until DNA extraction.

130

### 131 **DNA Extraction, PCR, and Sequencing**

132 Each leaf disc was surface-sterilized by immersing them in 1% NaClO for 1 min and it was  
133 subsequently washed in 70% ethanol. DNA extraction was extracted with a  
134 cetyltrimethylammonium bromide (CTAB) method after pulverizing the roots with 4 mm  
135 zirconium balls at 25 Hz for 3 min using a TissueLyser II (Qiagen).

136 For each leaf disc sample, the 16S rRNA V4 region of the prokaryotes and the internal  
137 transcribed spacer 1 (ITS1) region of fungi were PCR-amplified. The PCR of the 16S rRNA  
138 region was performed with the forward primer 515f (Caporaso et al. 2011) fused with 3–  
139 6-mer Ns for improved Illumina sequencing quality (Lundberg et al. 2013) and the forward  
140 Illumina sequencing primer (5'- TCG TCG GCA GCG TCA GAT GTG TAT AAG AGA  
141 CAG- [3–6-mer Ns] – [515f] -3') and the reverse primer 806rB (Apprill et al. 2015) fused  
142 with 3–6-mer Ns and the reverse sequencing primer (5'- GTC TCG TGG GCT CGG AGA  
143 TGT GTA TAA GAG ACA G [3–6-mer Ns] - [806rB] -3') (0.2 µM each). To inhibit the  
144 PCR-amplification of mitochondrial and chloroplast 16S rRNA sequences of host plants,  
145 specific peptide nucleic acids [mPNA and pPNA; Lundberg et al. (2013)] (0.25 µM each)  
146 were added to the reaction mix of KOD FX Neo (Toyobo). The temperature profile of the  
147 PCR was 94 °C for 2 min, followed by 35 cycles at 98 °C for 10 s, 78 °C for 10 s, 60 °C for 30  
148 s, 68 °C for 50 s, and a final extension at 68 °C for 5 min. To prevent generation of chimeric  
149 sequences, the ramp rate through the thermal cycles was set to 1 °C/sec (Stevens et al. 2013).  
150 Illumina sequencing adaptors were then added to respective samples in the supplemental PCR  
151 using the forward fusion primers consisting of the P5 Illumina adaptor, 8-mer indexes for  
152 sample identification (Hamady et al. 2008) and a partial sequence of the sequencing primer  
153 (5'- AAT GAT ACG GCG ACC ACC GAG ATC TAC AC - [8-mer index] - TCG TCG  
154 GCA GCG TC -3') and the reverse fusion primers consisting of the P7 adaptor, 8-mer indexes,  
155 and a partial sequence of the sequencing primer (5'- CAA GCA GAA GAC GGC ATA CGA

156 GAT - [8-mer index] - GTC TCG TGG GCT CGG -3'). KOD FX Neo was used with a  
157 temperature profile of 94 °C for 2 min, followed by 8 cycles at 98 °C for 10 s, 55 °C for 30 s,  
158 68 °C for 50 s (ramp rate = 1 °C/s), and a final extension at 68 °C for 5 min.

159 The PCR amplicons of the 135 tomato individuals (and negative control samples) were  
160 then pooled after a purification/equalization process with the AMPureXP Kit (Beckman  
161 Coulter). Primer dimers were removed from the pooled library by a supplemental AMPureXP  
162 purification process, in which the ratio of AMPureXP reagent to the pooled library was set to  
163 0.6 (v/v).

164 The PCR of the fungal ITS1 region was performed with the forward primer ITS1F-KYO1  
165 (Toju et al. 2012) fused with 3–6-mer Ns for improved Illumina sequencing quality  
166 (Lundberg et al. 2013) and the forward Illumina sequencing primer (5'- TCG TCG GCA  
167 GCG TCA GAT GTG TAT AAG AGA CAG- [3–6-mer Ns] – [ITS1F-KYO1] -3') and the  
168 reverse primer ITS2-KYO2 (Toju et al. 2012) fused with 3–6-mer Ns and the reverse  
169 sequencing primer (5'- GTC TCG TGG GCT CGG AGA TGT GTA TAA GAG ACA G [3–  
170 6-mer Ns] - [ITS2-KYO2] -3'). The PCR was performed based on the buffer and polymerase  
171 system of KOD FX Neo with a temperature profile of 94 °C for 2 min, followed by 35 cycles  
172 at 98 °C for 10 s, 58 °C for 30 s, 68 °C for 50 s, and a final extension at 68 °C for 5 min.  
173 Illumina sequencing adaptors and 8-mer index sequences were added in the additional PCR  
174 and then the amplicons were purified and pooled as described above.

175 The sequencing libraries of the prokaryote 16S and fungal ITS regions were processed in  
176 an Illumina MiSeq sequencer (run center: KYOTO-HE; 15% PhiX spike-in). In general,  
177 quality of forward sequence data is generally higher than that of reverse sequence data in  
178 Illumina sequencing. Therefore, we optimized the settings of the Illumina sequencing run by  
179 targeting only forward sequences. Specifically, the numbers of the forward and reverse cycles  
180 were set 271 and 31, respectively: the reverse sequences were used only for discriminating  
181 between 16S and ITS1 sequences *in silico* based on the sequences of primer positions.

182

183 **Bioinformatics**

184 The raw sequencing data were converted into FASTQ files using the Illumina's program  
185 bcl2fastq 1.8.4. The obtained FASTQ files were demultiplexed with the program Claident  
186 v0.2.2018.05.29 (Tanabe & Toju 2013; Tanabe 2018), by which sequencing reads whose  
187 8-mer index positions included nucleotides with low (< 30) quality scores were removed. The  
188 sequencing data were deposited to DNA Data Bank of Japan (DDBJ) (BioProject accession:  
189 PRJDB7150). Only forward sequences were used in the following analyses after trimming  
190 low-quality 3'-end sequences using Claident. Noisy reads (Tanabe 2018) were subsequently  
191 discarded and then denoised dataset consisting of 1,201,840 16S and 1,730,457 ITS1 reads  
192 were obtained.

193 For each region (16S or ITS1), filtered reads were clustered with a cut-off sequencing  
194 similarity of 97% using the program VSEARCH (Rognes et al. 2014) as implemented in  
195 Claident. The operational taxonomic units (OTUs) representing less than 10 sequencing reads  
196 were discarded and then the molecular identification of the remaining OTUs was performed  
197 based on the combination of the query-centric auto-*k*-nearest neighbor (QCauto) algorithm of  
198 reference database search (Tanabe & Toju 2013) and the lowest common ancestor (LCA)  
199 algorithm of taxonomic assignment (Huson et al. 2007) as implemented in Claident. Note that  
200 taxonomic identification results based on the QCauto-LCA pipeline are comparable to, or  
201 sometimes more accurate than, those with the alternative approaches (Tanabe & Toju 2013;  
202 Toju et al. 2016a; Toju et al. 2016b). In total, 143 prokaryote (bacterial or archaeal) OTUs and  
203 529 fungal OTUs were obtained for the 16S and ITS1 regions, respectively (Supplementary  
204 Data 1). The UNIX codes used in the above bioinformatic pipeline are provided as  
205 Supplementary Data 2.

206 For each target region (16S or ITS1), we obtained a sample × OTU matrix, in which a  
207 cell entry depicted the number of sequencing reads of an OTU in a sample (Supplementary  
208 Data 3). To minimize effects of PCR/sequencing errors, cell entries whose read counts  
209 represented less than 0.1% of the total read count of each sample were removed [cf. Peay et al.  
210 (2015)]. The filtered matrix was then rarefied to 500 reads per sample using the “rarefy”  
211 function of the vegan 2.4-5 package (Oksanen et al. 2017) of R 3.4.3 (R-Core-Team 2017).  
212 Samples with less than 500 reads were discarded in this process. In total, the rarefied matrices



213 of the 16S and ITS1 regions included 125 and 132 samples, respectively: at least 13 replicate  
214 samples per treatment were retained in both datasets (Supplementary Data 4).

215

## 216 **Community Structure in the phyllosphere**

217 Relationship between the number of sequencing reads and that of prokaryote/fungal OTUs  
218 was examined for each dataset (16S or ITS1) with the vegan “rarecurve” function of R.  
219 Likewise, relationship between the number of samples and that of OTUs was examined with  
220 the vegan “specaccum” function. For each dataset, difference in order- or genus-level  
221 community compositions among seedling treatments (rootstock varieties) was examined by  
222 the permutational analysis of variance [PERMANOVA; Anderson (2001)] with the vegan  
223 “adonis” function (10,000 permutations). To control spatial effects in the field experiment  
224 data, the information of replicate sample sets (Fig. 1) was included as an explanatory variable  
225 in the PERMANOVA. The “Raup-Crick” metric (Chase et al. 2011) was used to calculate  
226  $\beta$ -diversity based on the order- or genus-level data matrices (Supplementary Data 5).

227 To explore prokaryote/fungal taxa whose occurrences on tomato individuals were  
228 associated with rootstock varieties, a series of analysis of variance (ANOVA) was performed.  
229 Specifically, based on the genus-level matrix of the 16S or ITS1 dataset (Supplementary Data  
230 5), an ANOVA model was constructed for each prokaryote/fungal genus by including the  
231 proportion of the sequencing reads of the target genus and the rootstock variety information  
232 of host tomatoes as response and explanatory variables, respectively. The information of  
233 replicate samples (i.e., location information) was included as an additional explanatory  
234 variable. Genera that occurred in less than 30 tomato individuals were excluded from the  
235 analysis.

236

## 237 **Randomization Analysis of Preferences for Rootstock Varieties**

238 We further explored prokaryote/fungal taxa showing preferences for specific rootstock  
239 varieties based on a randomization analysis. In the sample  $\times$  genus matrix of the 16S or ITS1

240 dataset (Supplementary Data 5), the labels of rootstock varieties were shuffled (100,000  
241 permutations) and then preference of a prokaryote/fungal genus ( $i$ ) for a rootstock variety ( $j$ )  
242 was evaluated as follows:

$$243 \quad \textit{Preference}(i, j) = [N_{\text{observed}}(i, j) - \text{Mean}(N_{\text{ranodimized}}(i, j))] / \text{SD}(N_{\text{ranodimized}}(i, j)),$$

244 where  $N_{\text{observed}}(i, j)$  denoted the mean number of the sequencing reads of genus  $i$  across  
245 rootstock variety  $j$  tomato samples in the original data, and the  $\text{Mean}(N_{\text{ranodimized}}(i, j))$  and  $\text{SD}$   
246 ( $N_{\text{ranodimized}}(i, j)$ ) were the mean and standard deviation of the number of sequencing reads for  
247 the focal genus–rootstock combination across randomized matrices. Genera that occurred in  
248 30 or more tomato individuals were subjected to the randomization analysis.

249 For the genera that showed significant preferences for specific tomato rootstock varieties,  
250 we performed an additional analysis to evaluate which bacterial/fungal OTUs in each genus  
251 had strong host-variety preferences. Specifically, the randomization analysis of the above  
252 preference index (100,000 permutations) was applied to rarefied sample  $\times$  OTU matrix of the  
253 16S or ITS1 dataset (Supplementary Data 4). OTUs that occurred in less than 30 tomato  
254 individuals were excluded from the analysis.

255

## 256 **RESULTS**

### 257 **Community Structure in the phyllosphere**

258 On average, 13.6 (SD = 4.2) prokaryote and 26.3 (SD = 9.4) fungal OTUs per sample were  
259 observed in the rarefied data matrices (Supplementary Fig. 1). The total numbers of  
260 prokaryote and fungal OTUs included in the rarefied datasets were 116 and 413, respectively  
261 (Supplementary Data. 4). All the prokaryote OTUs belonged to Bacteria: no archaeal OTUs  
262 were observed.

263 In the bacterial community of the tomato phyllosphere, bacteria in the orders  
264 Sphingomonadales and Rhizobiales were dominant (Fig. 2A). Bacteria in the order  
265 Pseudomonadales were frequently observed, too, across the tomato varieties examined.

266 Meanwhile, bacteria in the order Deinococcales were abundant only in the ungrafted tomato  
267 individuals (Fig. 2A). At the genus-level, the genera *Sphingomonas*, *Methylobacterium*, and  
268 *Pseudomonas* were frequently observed across the rootstock varieties examined, while  
269 *Deinococcus* bacteria were abundant only in the ungrafted tomatoes (Fig. 2B).

270 In the phyllosphere fungal community, ascomycete fungi in the orders Capnodiales and  
271 Plesporales and the basidiomycete fungi in the orders Tremellales and Ustiaginales were  
272 abundant (Fig. 2C). At the genus-level, *Cladosporium*, *Dioszegia*, *Moesziomyces* (anamorph  
273 = *Pseudozyma*), and *Hannaella* were frequently observed (Fig. 2D). Among them, *Hannaella*  
274 fungi dominated the phyllosphere fungal community of the tomato rootstock variety  
275 “Ganbarune” (the proportion of *Hannaella* reads = 19.0 %), while their proportion was  
276 relatively low on other host varieties (2.3–9.1 %; Fig. 2D).

277 A statistical test based on PERMANOVA showed that replicate sampling positions, but  
278 not tomato rootstock varieties, significantly explained variation in the whole structure of the  
279 bacterial/fungal community (Table 1). However, further analyses targeting respective genera  
280 (Table 2 and 3) indicated that the proportion of the fungal genus *Hannaella* varied among  
281 tomato rootstock varieties, although the pattern was non-significant after a Bonferroni  
282 correction of *P* values. Meanwhile, the proportion of some taxa such as the bacterial genus  
283 *Sphingomonas* and the fungal genus *Cladosporium* varied significantly among replicates  
284 (Tables 2 and 3), suggesting that spatial positions in the experimental field affected the  
285 formation of the phyllosphere microbial communities of the tomato plants.

286

### 287 **Randomization Analysis of Preferences for Rootstock Varieties**

288 A randomization analysis indicated that the bacterial genus *Deinococcus* occurred  
289 preferentially on the ungrafted tomato individuals (Fig. 3A). Likewise, the fungal genus  
290 *Hannaella* showed preferences for the rootstock variety “Ganbarune” (Fig. 3B). In an  
291 additional randomization analysis, a bacterial OTU phylogenetically allied to *Deinococcus*  
292 *citri* (P\_040) and fungal OTUs allied to *Hannaella oryzae* (F\_427 and F\_428) displayed  
293 statistically significant preferences for ungrafted and “Ganbarune” tomato plants, respectively

294 (Table 4).

295

## 296 **DISCUSSION**

297 The field experiment using eight tomato rootstock varieties suggested that below-ground plant  
298 genotypes did not significantly affect the entire structures of the phyllosphere microbiomes  
299 (Table 1). However, detailed analyses indicated the existence of phyllosphere microbial taxa  
300 whose associations with host plants were affected by below-ground plant genotypes (Figs. 2  
301 and 3; Tables 2-4). Thus, this study not only shows to what extent above-ground microbiome  
302 structures of grafted plants are affected/unaffected by below-ground genotypes but also  
303 suggests which phyllosphere microbial taxa can be managed by selecting rootstock varieties  
304 of crop plants.

305 The phyllosphere bacterial communities of the tomato individuals analyzed in this study  
306 were dominated by Alphaproteobacteria (e.g., *Sphingomonas* and *Methylobacterium*) as well  
307 as Gammaproteobacteria (e.g., *Pseudomonas*) as has been reported in previous studies on  
308 crop and non-crop plants (Lindow & Brandl 2003; Vorholt 2012; Bai et al. 2015) (Fig. 2).  
309 Among the dominant bacteria, *Pseudomonas* is recognized mainly as plant pathogenic taxon  
310 (Buell et al. 2003; Yu et al. 2013), although some *Pseudomonas* species are known to  
311 suppress leaf fungal pathogens by producing antibiotics (Flaishman et al. 1996; De Meyer &  
312 Höfte 1997). The genus *Sphingomonas* is known to involve species that protect host plants  
313 against *Pseudomonas* pathogens (Innerebner et al. 2011; Vogel et al. 2012) or promote plant  
314 growth by producing phytohormones such as gibberellins and indole acetic acid (Khan et al.  
315 2014). Bacteria in the genus *Methylobacterium* are often localized around stomatal pores in  
316 the phyllosphere (Abanda-Nkpwatt et al. 2006), using plant-derived methanol as principal  
317 carbon source (Delmotte et al. 2009; Schauer & Kutschera 2011; Knief et al. 2012; Ryffel et  
318 al. 2016). Genomic studies have shown that *Methylobacterium* genomes involve genes of  
319 metabolic pathways that potentially contribute to host plant growth (e.g., auxin biosynthesis,  
320 cytokine biosynthesis, and vitamin B<sub>12</sub> biosynthesis) (Kwak et al. 2014). *Methylobacterium* is  
321 also known to induce resistance of plants against fungal pathogens, nominated as prospective

322 a biocontrol agent (Madhaiyan et al. 2006). Thus, these dominant bacteria, whose associations  
323 with hosts are likely irrespective of host below-ground genotypes (Fig. 2), may affect growth  
324 of tomato plants both positively and negatively.

325 Our data also indicated that fungi in the ascomycete genus *Cladosporium* and the  
326 basidiomycete genera *Dioszegia* and *Moesziomyces* (anamorph = *Pseudozyma*) were abundant  
327 within the tomato phyllosphere (Fig. 2). Among them, *Cladosporium* involves a  
328 well-characterized pathogenic species, *C. fulvum*, which causes tomato leaf mold (De Wit &  
329 Spikman 1982; van Kan et al. 1991; Jones et al. 1994; Rivas & Thomas 2005). The  
330 basidiomycete taxa listed above are characterized by their anamorphic yeast forms and they  
331 have been observed in the phyllosphere of various plant species (Inácio et al. 2005; Karlsson  
332 et al. 2014; Sapkota et al. 2015; Kruse et al. 2017). For example, *Dioszegia*, a basidiomycete  
333 taxon in the order Tremellales, has been reported from cereal and *Arabidopsis* (Sapkota et al.  
334 2015; Wang et al. 2016), potentially playing key roles within microbe–microbe interaction  
335 webs in the phyllosphere (Agler et al. 2016). The genus *Moesziomyces* is represented by  
336 plant-pathogenic smut fungi (Diagne-Leye et al. 2013). However, a recent phylogenetic study  
337 of teleomorphic (*Moesziomyces*) and anamorphic (*Pseudozyma*) specimens (Kruse et al.  
338 2017) suggested that this Ustilaginaceae taxon could involve not only phytopathogenic  
339 species but also species with antifungal properties against the causal agent of cucumber  
340 powdery mildew (*Podosphaera fuliginea*) (Avis et al. 2001) or those that can induce  
341 resistance of host plants against fungal pathogens such as *Botrytis cinerea* (Buxdorf et al.  
342 2013). Thus, the community data, as a whole, suggest that not only dominant bacterial taxa  
343 but also various fungal taxa potentially play complex physiological roles in the phyllosphere  
344 of tomato plants.

345 While there were bacterial and fungal taxa commonly associated with tomato plants  
346 irrespective of host below-ground genotypes, fungi in the genus *Hannaella* displayed  
347 preferences for rootstock genotypes (Fig. 3; Tables 3 and 4). Specifically, *Hannaella* was the  
348 most abundant fungal taxon in the tomato individuals whose rootstock genotype was  
349 “Ganbarune” (Fig. 2). Like other yeast taxa in Tremellaceae (e.g., *Deroxomyces* and  
350 *Dioszegia*) (Wang & Bai 2008), *Hannaella* yeasts are frequently observed in the phyllosphere

351 of various plant species (Nutaratat et al. 2014; Kaewwichian et al. 2015; Nasanit et al. 2015;  
352 Nasanit et al. 2016). Some *Hannaella* species are known to produce indol acetic acid  
353 (Nutaratat et al. 2014; Sun et al. 2014), although a study has suggested that the yeasts do not  
354 necessarily promote plant growth (Sun et al. 2014). Therefore, it remains a challenge to  
355 understand how *Hannaella* yeasts interact with other yeasts and bacterial/fungal species in/on  
356 plant leaves and how they influence plant performance host-genotype specifically.

357 The randomization analysis performed in this study also indicated that a bacterial OTU  
358 phylogenetically allied to the *Deinococcus* species isolated from leaf canker lesions of citrus  
359 trees (Ahmed et al. 2014) had a preference for ungrafted tomato individuals (Fig. 3; Tables 2  
360 and 4). Given that this bacterial OTU was rarely observed in self-grafted tomato individuals  
361 (Fig. 2), grafting treatment *per se*, rather than plant genotypes, could be responsible for the  
362 biased distribution of the bacterium. This finding is of particular interest because *Deinococcus*  
363 is famous for its high tolerance to desiccation (Mattimore & Battista 1996; Tanaka et al.  
364 2004). Grafting itself has been recognized as a way for increasing plants' resistance against  
365 drought stress (Schwarz et al. 2010; Warschefsky et al. 2016). Thus, the above-ground parts  
366 of the ungrafted tomato plants might uptake less water than grafted plants, resulting in the  
367 high proportion of the desiccation-tolerant bacteria in the phyllosphere.

368 Although this study provides some implications for how phyllosphere microbiomes of  
369 grafted plants can be influenced by rootstock genotypes, potential pitfalls of the present  
370 results should be taken into account. First, as our data were based on a snapshot sampling in  
371 the late growing season of tomato, we are unable to infer the timing at which the observed  
372 bacteria and fungi colonized the tomato phyllosphere. Therefore, some of the detected  
373 bacterial and fungal OTUs might colonize the tomato individuals before they were  
374 transplanted into the experimental field. However, given that spatial positions within the field  
375 had significant effects on the microbial community structures (Table 1), colonization of  
376 indigenous (resident) microbes in the field could be a major factor determining the observed  
377 microbiome pattern. Second, we need to acknowledge that microbiome profiling with  
378 high-throughput DNA sequencing *per se* does not reveal the fine-scale distribution of the  
379 detected microbial OTUs in the phyllosphere. Although we surface-sterilized the leaf samples,

380 the microbiome data involved not only possibly endophytic taxa but also bacteria and fungi  
381 that have been regarded as epiphytes (e.g., *Methylobacterium*) (Omer et al. 2004;  
382 Abanda-Nkwatt et al. 2006) [but see Jourand et al. (2004)]. Microscopic analyses with  
383 taxon-specific fluorescent probes, for example, will provide essential insights into the  
384 localization of the observed microbes in the phyllosphere. Third, while this study was  
385 designed to examine effects of below-ground genotypes on above-ground parts of grafted  
386 plants, recent studies have shown that genetic materials (i.e., DNA) can be transported  
387 between scion and rootstock tissue, at least at graft junction region, in a grafted plant  
388 (Stegemann & Bock 2009). Thus, contributions of above-/below-ground genotypes to  
389 rhizosphere/phyllosphere microbiomes may be much more complex than had been assumed in  
390 this study.

391 Overall, this study suggested that majority of phyllosphere microbes can be associated  
392 with grafted tomato plants irrespective of rootstock genotypes of their hosts. Meanwhile,  
393 phyllosphere microbial taxa could display preferences for grafted/ungrafted plants or specific  
394 host rootstock varieties. Both grafting and the use of plant-beneficial microbes have been  
395 regarded as prospective options for securing agricultural/forestry production in the era of  
396 increasing biotic and abiotic environmental stresses (Schwarz et al. 2010; Schlaeppli &  
397 Bulgarelli 2015; Warschefsky et al. 2016; Toju et al. 2018). Further integrative studies will  
398 help us explore best conditions in which grafting and microbiome technologies are merged  
399 into a solid basis of stable and sustainable agricultural practices.

400

## 401 **AUTHOR CONTRIBUTIONS**

402 H.T., K.O., and M.N. performed experiments. H.T. analyzed data. H.T. wrote the paper with  
403 M.N.

404

## 405 **ACKNOWLEDGEMENTS**

406 We thank Satomi Yoshinami, Akira Matsumoto, Tomoaki Muranaka, Sarasa Amma, and  
407 Hiroki Kawai for their support in field experiment and/or molecular experiments. This work  
408 was financially supported by JST PRESTO (JPMJPR16Q6) to H.T. and MAFF science and  
409 technology research promotion program for agriculture, forestry, fisheries and food industry  
410 grant (16770567) and JST PRESTO (JPMJPR15O3) to M.N..

411

## 412 SUPPLEMENTARY MATERIAL

413 The Supplementary Material for this article can be found online at: [XXXX](#).

414

## 415 REFERENCES

- 416 Abanda-Nkpwatt D, Müsch M, Tschiersch J, Boettner M, Schwab W (2006) Molecular  
417 interaction between *Methylobacterium extorquens* and seedlings: growth promotion,  
418 methanol consumption, and localization of the methanol emission site. *J. Exp. Bot.* 57,  
419 4025-4032. doi: 10.1093/jxb/erl173
- 420 Agler MT, Ruhe J, Kroll S, Morhenn C, Kim S-T, Weigel D, *et al.* (2016) Microbial hub taxa  
421 link host and abiotic factors to plant microbiome variation. *PLOS Biol.* 14, e1002352.  
422 doi: 10.1371/journal.pbio.1002352
- 423 Ahmed I, Abbas S, Kudo T, Iqbal M, Fujiwara T, Ohkuma M (2014) *Deinococcus citri* sp.  
424 nov., isolated from citrus leaf canker lesions. *Int. J. Syst. Evol. Microbiol.* 64,  
425 4134-4140. doi: 10.1099/ij.s.0.066555-0
- 426 Anderson MJ (2001) A new method for non-parametric multivariate analysis of variance.  
427 *Austral Ecol.* 26, 32-46. doi: 10.1111/j.1442-9993.2001.01070.pp.x
- 428 Anderson PK, Cunningham AA, Patel NG, Morales FJ, Epstein PR, Daszak P (2004)  
429 Emerging infectious diseases of plants: pathogen pollution, climate change and  
430 agrotechnology drivers. *Trends in Ecology & Evolution* 19, 535-544. doi:  
431 10.1016/j.tree.2004.07.021
- 432 Apprill A, McNally S, Parsons R, Weber L (2015) Minor revision to V4 region SSU rRNA



- 433 806R gene primer greatly increases detection of SAR11 bacterioplankton. *Aquat.*  
434 *Microb. Ecol.* 75, 129-137. doi: 10.3354/ame01753
- 435 Arnold AE, Mejía LC, Kyllo D, Rojas EI, Maynard Z, Robbins N, *et al.* (2003) Fungal  
436 endophytes limit pathogen damage in a tropical tree. *Proc. Natl. Acad. Sci. USA.* 100,  
437 15649-15654. doi: 10.1073/pnas.2533483100
- 438 Avis T, Caron S, Boekhout T, Hamelin R, Bélanger R (2001) Molecular and physiological  
439 analysis of the powdery mildew antagonist *Pseudozyma flocculosa* and related fungi.  
440 *Phytopathology* 91, 249-254. doi: 10.1094/PHYTO.2001.91.3.249
- 441 Bai Y, Müller DB, Srinivas G, Garrido-Oter R, Potthoff E, Rott M, *et al.* (2015) Functional  
442 overlap of the *Arabidopsis* leaf and root microbiota. *Nature* 528, 364-369. doi:  
443 10.1038/nature16192
- 444 Bodenhausen N, Bortfeld-Miller M, Ackermann M, Vorholt JA (2014) A synthetic  
445 community approach reveals plant genotypes affecting the phyllosphere microbiota.  
446 *PLOS Genetics* 10, e1004283. doi: 10.1371/journal.pgen.1004283
- 447 Buell CR, Joardar V, Lindeberg M, Selengut J, Paulsen IT, Gwinn ML, *et al.* (2003) The  
448 complete genome sequence of the *Arabidopsis* and tomato pathogen *Pseudomonas*  
449 *syringae* pv. tomato DC3000. *Proc. Natl. Acad. Sci. USA.* 100, 10181-10186. doi:  
450 10.1073/pnas.1731982100
- 451 Bulgarelli D, Garrido-Oter R, Münch PC, Weiman A, Dröge J, Pan Y, *et al.* (2015) Structure  
452 and function of the bacterial root microbiota in wild and domesticated barley. *Cell*  
453 *Host Microbe* 17, 392-403. doi: 10.1016/j.chom.2015.01.011
- 454 Busby PE, Soman C, Wagner MR, Friesen ML, Kremer J, Bennett A, *et al.* (2017) Research  
455 priorities for harnessing plant microbiomes in sustainable agriculture. *PLOS Biol.* 15,  
456 e2001793. doi: 10.1371/journal.pbio.2001793
- 457 Buxdorf K, Rahat I, Gafni A, Levy M (2013) The epiphytic fungus *Pseudozyma aphidis*  
458 induces jasmonic acid-and salicylic acid/nonexpressor of PR1-independent local and  
459 systemic resistance. *Plant physiology* 161, 2014-2022. doi:
- 460 Callaway E (2016) Devastating wheat fungus appears in Asia for first time. *Nature* 532,  
461 421-422. doi: 10.1038/532421a

- 462 Caporaso JG, Lauber CL, Walters WA, Berg-Lyons D, Lozupone CA, Turnbaugh PJ, *et al.*  
463 (2011) Global patterns of 16S rRNA diversity at a depth of millions of sequences per  
464 sample. *Proc. Natl. Acad. Sci. USA.* 108, 4516-4522. doi: 10.1073/pnas.1000080107
- 465 Castrillo G, Teixeira PJPL, Paredes SH, Law TF, De Lorenzo L, Feltcher ME, *et al.* (2017)  
466 Root microbiota drive direct integration of phosphate stress and immunity. *Nature* 543,  
467 513-518. doi: 10.1038/nature21417
- 468 Chase JM, Kraft NJ, Smith KG, Vellend M, Inouye BD (2011) Using null models to  
469 disentangle variation in community dissimilarity from variation in  $\alpha$ -diversity.  
470 *Ecosphere* 2, 1-11. doi:
- 471 Collard BC, Mackill DJ (2008) Marker-assisted selection: an approach for precision plant  
472 breeding in the twenty-first century. *Phil. Trans. R. Soc. B.* 363, 557-572. doi:
- 473 De Meyer G, Höfte M (1997) Salicylic acid produced by the rhizobacterium *Pseudomonas*  
474 *aeruginosa* 7NSK2 induces resistance to leaf infection by *Botrytis cinerea* on bean.  
475 *Phytopathology* 87, 588-593. doi: 10.1094/PHYTO.1997.87.6.588
- 476 De Wit PJ, Spikman G (1982) Evidence for the occurrence of race and cultivar-specific  
477 elicitors of necrosis in intercellular fluids of compatible interactions of *Cladosporium*  
478 *fulvum* and tomato. *Physiol. Plant Pathol.* 21, 1-11. doi:
- 479 Dean R, Van Kan JA, Pretorius ZA, Hammond-Kosack KE, Di Pietro A, Spanu PD, *et al.*  
480 (2012) The Top 10 fungal pathogens in molecular plant pathology. *Mol. Plant Pathol.*  
481 13, 414-430. doi:
- 482 Delmotte N, Knief C, Chaffron S, Innerebner G, Roschitzki B, Schlapbach R, *et al.* (2009)  
483 Community proteogenomics reveals insights into the physiology of phyllosphere  
484 bacteria. *Proc. Natl. Acad. Sci. USA.* 106, 16428-16433. doi:  
485 10.1073/pnas.0905240106
- 486 Diagne-Leye G, Sare IC, Martinez Y, Fall-Ndiaye MA, Sabbagh SK, Ba AT, *et al.* (2013)  
487 The life cycle of the smut fungus *Moesziomyces penicillariae* is adapted to the  
488 short-cycle of the host, *Pennisetum glaucum*. *Fungal Biol.* 117, 311-318. doi:  
489 10.1016/j.funbio.2013.03.002
- 490 Dodds PN, Rathjen JP (2010) Plant immunity: towards an integrated view of plant-pathogen  
491 interactions. *Nat. Rev. Genetics* 11, 539. doi:

- 492 Edwards J, Johnson C, Santos-Medellín C, Lurie E, Podishetty NK, Bhatnagar S, *et al.* (2015)  
493 Structure, variation, and assembly of the root-associated microbiomes of rice. *Proc.*  
494 *Natl. Acad. Sci. USA.* 112, E911-E920. doi: 10.1073/pnas.1414592112
- 495 Flaishman MA, Eyal Z, Zilberstein A, Voisard C, Haas D (1996) Suppression of *Septoria*  
496 *tritici* blotch and leaf rust of wheat by recombinant cyanide-producing strains of  
497 *Pseudomonas putida*. *Mol. Plant Microb. Int.* 9, 642-645. doi: Doi  
498 10.1094/Mpmi-9-0642
- 499 Flores FB, Sanchez-Bel P, Estan MT, Martinez-Rodriguez MM, Moyano E, Morales B, *et al.*  
500 (2010) The effectiveness of grafting to improve tomato fruit quality. *Scientia*  
501 *Horticulturae* 125, 211-217. doi: 10.1016/j.scienta.2010.03.026
- 502 Goldschmidt EE (2014) Plant grafting: new mechanisms, evolutionary implications. *Frontiers*  
503 *in plant Science* 5, 727. doi: 10.3389/fpls.2014.00727
- 504 Hamady M, Walker JJ, Harris JK, Gold NJ, Knight R (2008) Error-correcting barcoded  
505 primers for pyrosequencing hundreds of samples in multiplex. *Nat. Methods* 5,  
506 235-237. doi: 10.1038/nmeth.1184
- 507 Hiruma K, Gerlach N, Sacristán S, Nakano RT, Hacquard S, Kracher B, *et al.* (2016) Root  
508 endophyte *Colletotrichum tofieldiae* confers plant fitness benefits that are phosphate  
509 status dependent. *Cell* 165, 464-474. doi: 10.1016/j.cell.2016.02.028
- 510 Huson DH, Auch AF, Qi J, Schuster SC (2007) MEGAN analysis of metagenomic data.  
511 *Genome Res.* 17, 377-386. doi: 10.1101/gr.5969107
- 512 Inácio J, Portugal L, Spencer-Martins I, Fonseca Á (2005) Phylloplane yeasts from Portugal:  
513 seven novel anamorphic species in the Tremellales lineage of the Hymenomycetes  
514 (Basidiomycota) producing orange-coloured colonies. *FEMS Yeast Res.* 5, 1167-1183.  
515 doi: 10.1016/j.femsyr.2005.05.007
- 516 Innerebner G, Knief C, Vorholt JA (2011) Protection of *Arabidopsis thaliana* against  
517 leaf-pathogenic *Pseudomonas syringae* by *Sphingomonas* strains in a controlled model  
518 system. *Appl. Env. Microbiol.* 77, 3202-3210. doi: 10.1128/AEM.00133-11
- 519 Jones DA, Thomas CM, Hammond-Kosack KE, Balint-Kurti PJ, Jones J (1994) Isolation of  
520 the tomato Cf-9 gene for resistance to *Cladosporium fulvum* by transposon tagging.  
521 *Science* 266, 789-793. doi:

- 522 Jourand P, Giraud E, Bena G, Sy A, Willems A, Gillis M, *et al.* (2004) *Methylobacterium*  
523 *nodulans* sp. nov., for a group of aerobic, facultatively methylotrophic, legume  
524 root-nodule-forming and nitrogen-fixing bacteria. *Int. J. Syst. Evol. Microbiol.* 54,  
525 2269-2273. doi:
- 526 Kaewwichian R, Jindamorakot S, Am-In S, Sipiczki M, Limtong S (2015) *Hannaella*  
527 *siamensis* sp. nov. and *Hannaella phetchabunensis* sp. nov., two new anamorphic  
528 basidiomycetous yeast species isolated from plants. *Int. J. Syst. Evol. Microbiol.* 65,  
529 1297-1303. doi: 10.1099/ijms.0.000101
- 530 Karlsson I, Friberg H, Steinberg C, Persson P (2014) Fungicide effects on fungal community  
531 composition in the wheat phyllosphere. *PLOS ONE* 9, e111786. doi:  
532 10.1371/journal.pone.0111786
- 533 Khah E, Kakava E, Mavromatis A, Chachalis D, Goulas C (2006) Effect of grafting on  
534 growth and yield of tomato (*Lycopersicon esculentum* Mill.) in greenhouse and  
535 open-field. *J. Appl. Hort.* 8, 3-7. doi:
- 536 Khan AL, Waqas M, Kang S-M, Al-Harrasi A, Hussain J, Al-Rawahi A, *et al.* (2014)  
537 Bacterial endophyte *Sphingomonas* sp. LK11 produces gibberellins and IAA and  
538 promotes tomato plant growth. *J. Microbiol.* 52, 689-695. doi:  
539 10.1007/s12275-014-4002-7
- 540 Knief C, Delmotte N, Chaffron S, Stark M, Innerebner G, Wassmann R, *et al.* (2012)  
541 Metaproteogenomic analysis of microbial communities in the phyllosphere and  
542 rhizosphere of rice. *ISME J.* 6, 1378-1390. doi: 10.1038/ismej.2011.192
- 543 Kruse J, Doehlemann G, Kemen E, Thines M (2017) Asexual and sexual morphs of  
544 *Moesziomyces* revisited. *IMA Fungus* 8, 117-129. doi:  
545 10.5598/ima fungus.2017.08.01.09
- 546 Kwak M-J, Jeong H, Madhaiyan M, Lee Y, Sa T-M, Oh TK, *et al.* (2014) Genome  
547 information of *Methylobacterium oryzae*, a plant-probiotic methylotroph in the  
548 phyllosphere. *PLOS ONE* 9, e106704. doi: 10.1371/journal.pone.0106704
- 549 Lindow SE, Brandl MT (2003) Microbiology of the phyllosphere. *Appl. Env. Microbiol.* 69,  
550 1875-1883. doi:
- 551 Ling N, Song Y, Raza W, Huang QW, Guo SW, Shen QR (2015) The response of

- 552 root-associated bacterial community to the grafting of watermelon. *Plant Soil* 391,  
553 253-264. doi: 10.1007/s11104-015-2399-3
- 554 Liu J, Abdelfattah A, Norelli J, Burchard E, Schena L, Droby S, *et al.* (2018) Apple  
555 endophytic microbiota of different rootstock/scion combinations suggests a  
556 genotype-specific influence. *Microbiome* 6. doi: 10.1186/s40168-018-0403-x
- 557 Lundberg DS, Yourstone S, Mieczkowski P, Jones CD, Dangl JL (2013) Practical innovations  
558 for high-throughput amplicon sequencing. *Nat. Methods* 10, 999-1002. doi:  
559 10.1038/nmeth.2634
- 560 Madhaiyan M, Reddy BS, Anandham R, Senthilkumar M, Poonguzhali S, Sundaram S, *et al.*  
561 (2006) Plant growth-promoting *Methylobacterium* induces defense responses in  
562 groundnut (*Arachis hypogaea* L.) compared with rot pathogens. *Current Microbiol.* 53,  
563 270-276. doi:
- 564 Marasco R, Rolli E, Fusi M, Michoud G, Daffonchio D (2018) Grapevine rootstocks shape  
565 underground bacterial microbiome and networking but not potential functionality.  
566 *Microbiome* 6. doi: 10.1186/s40168-017-0391-2
- 567 Martinez-Ballesta MC, Alcaraz-Lopez C, Muries B, Mota-Cadenas C, Carvajal M (2010)  
568 Physiological aspects of rootstock-scion interactions. *Scientia Hort.* 127, 112-118. doi:  
569 10.1016/j.scienta.2010.08.002
- 570 Martinez-Rodriguez MM, Estan MT, Moyano E, Garcia-Abellan JO, Flores FB, Campos JF,  
571 *et al.* (2008) The effectiveness of grafting to improve salt tolerance in tomato when an  
572 'excluder' genotype is used as scion. *Env. Exp. Bot.* 63, 392-401. doi:  
573 10.1016/j.envexpbot.2007.12.007
- 574 Mattimore V, Battista JR (1996) Radioresistance of *Deinococcus radiodurans*: functions  
575 necessary to survive ionizing radiation are also necessary to survive prolonged  
576 desiccation. *J. Bacteriol.* 178, 633-637. doi: DOI 10.1128/jb.178.3.633-637.1996
- 577 Mendes R, Garbeva P, Raaijmakers JM (2013) The rhizosphere microbiome: significance of  
578 plant beneficial, plant pathogenic, and human pathogenic microorganisms. *FEMS*  
579 *Microbiol. Rev.* 37, 634-663. doi: 10.1111/1574-6976.12028
- 580 Mendes R, Kruijt M, De Bruijn I, Dekkers E, van der Voort M, Schneider JH, *et al.* (2011)  
581 Deciphering the rhizosphere microbiome for disease-suppressive bacteria. *Science* 332,

- 582 1097-1100. doi: 10.1126/science.1203980
- 583 Nasanit R, Jaibangyang S, Tantirungkij M, Limtong S (2016) Yeast diversity and novel yeast  
584 D1/D2 sequences from corn phylloplane obtained by a culture-independent approach.  
585 *Antonie van Leeuwenhoek* 109, 1615-1634. doi: 10.1007/s10482-016-0762-x
- 586 Nasanit R, Krataithong K, Tantirungkij M, Limtong S (2015) Assessment of epiphytic yeast  
587 diversity in rice (*Oryza sativa*) phyllosphere in Thailand by a culture-independent  
588 approach. *Antonie Van Leeuwenhoek* 107, 1475-1490. doi:  
589 10.1007/s10482-015-0442-2
- 590 Notaguchi M, Okamoto S (2015) Dynamics of long-distance signaling via plant vascular  
591 tissues. *Front. Plant. Sci.* 6, 161. doi: 10.3389/fpls.2015.00161
- 592 Nutaratat P, Srisuk N, Arunrattiyakorn P, Limtong S (2014) Plant growth-promoting traits of  
593 epiphytic and endophytic yeasts isolated from rice and sugar cane leaves in Thailand.  
594 *Fungal Biol.* 118, 683-694. doi: 10.1016/j.funbio.2014.04.010
- 595 Oksanen J, Blanchet F, Friendly M, Kindt R, Legendre P, McGlinn D, *et al.* (2017) vegan:  
596 community ecology package. v. 2.4-5.
- 597 Omer ZS, Tombolini R, Gerhardson B (2004) Plant colonization by pink-pigmented  
598 facultative methylophilic bacteria (PPFMs). *FEMS Microbiol. Ecol.* 47, 319-326.  
599 doi:
- 600 Peay KG, Kennedy PG, Talbot JM (2016) Dimensions of biodiversity in the Earth  
601 mycobiome. *Nat. Rev. Microbiol.* 14, 434-447. doi: 10.1038/nrmicro.2016.59
- 602 Peay KG, Russo SE, McGuire KL, Lim Z, Chan JP, Tan S, *et al.* (2015) Lack of host  
603 specificity leads to independent assortment of dipterocarps and ectomycorrhizal fungi  
604 across a soil fertility gradient. *Ecol. Lett.* 18, 807-816. doi: 10.1111/ele.12459
- 605 R-Core-Team (2017) R 3.4.3: A language and environment for statistical computing available  
606 at <http://www.R-project.org/>. R Foundation for Statistical Computing, Vienna,  
607 Austri.
- 608 Rivard CL, O'Connell S, Peet MM, Welker RM, Louws FJ (2012) Grafting tomato to manage  
609 bacterial wilt caused by *Ralstonia solanacearum* in the southeastern United States.  
610 *Plant Disease* 96, 973-978. doi: 10.1094/pdis-12-10-0877

- 611 Rivas S, Thomas CM (2005) Molecular interactions between tomato and the leaf mold  
612 pathogen *Cladosporium fulvum*. *Annu. Rev. Phytopathol.* 43, 395-436. doi:
- 613 Rognes T, Mahé F, Flouri T, Quince C, Nichols B (2014) Vsearch: program available at  
614 <https://github.com/torognes/vsearch>.
- 615 Ruiz JM, Romero L (1999) Nitrogen efficiency and metabolism in grafted melon plants.  
616 *Scientia Hort.* 81, 113-123. doi: 10.1016/s0304-4238(98)00200-3
- 617 Ryffel F, Helfrich EJ, Kiefer P, Peyriga L, Portais J-C, Piel J, *et al.* (2016) Metabolic footprint  
618 of epiphytic bacteria on *Arabidopsis thaliana* leaves. *ISME J.* 10, 632-643. doi:  
619 10.1038/ismej.2015.141
- 620 Sapkota R, Knorr K, Jørgensen LN, O'Hanlon KA, Nicolaisen M (2015) Host genotype is an  
621 important determinant of the cereal phyllosphere mycobiome. *New Phytol.* 207,  
622 1134-1144. doi: 10.1111/nph.13418
- 623 Schauer S, Kutschera U (2011) A novel growth-promoting microbe, *Methylobacterium*  
624 *funariae* sp. nov., isolated from the leaf surface of a common moss. *Plant Signal.*  
625 *Behav.* 6, 510-515. doi: 10.4161/psb.6.4.14335
- 626 Schlaeppi K, Bulgarelli D (2015) The plant microbiome at work. *Mol. Plant-Microbe Int.* 28,  
627 212-217. doi: 10.1094/MPMI-10-14-0334-FI
- 628 Schwarz D, Roupheal Y, Colla G, Venema JH (2010) Grafting as a tool to improve tolerance  
629 of vegetables to abiotic stresses: thermal stress, water stress and organic pollutants.  
630 *Scientia Hort.* 127, 162-171. doi: 10.1016/j.scienta.2010.09.016
- 631 Song F, Pan ZY, Bai FX, An JY, Liu JH, Guo WW, *et al.* (2015) The scion/rootstock  
632 genotypes and habitats Affect arbuscular mycorrhizal fungal community in citrus.  
633 *Front. Microbiol.* 6, 1372. doi: 10.3389/fmicb.2015.01372
- 634 Stegemann S, Bock R (2009) Exchange of genetic material between cells in plant tissue grafts.  
635 *Science* 324, 649-651. doi: 10.1126/science.1170397
- 636 Stevens JL, Jackson RL, Olson JB (2013) Slowing PCR ramp speed reduces chimera  
637 formation from environmental samples. *J. Microbiol. Methods* 93, 203-205. doi:  
638 10.1016/j.mimet.2013.03.013
- 639 Sun P-F, Fang W-T, Shin L-Y, Wei J-Y, Fu S-F, Chou J-Y (2014) Indole-3-acetic

- 640 acid-producing yeasts in the phyllosphere of the carnivorous plant *Drosera indica* L.  
641 *PLOS ONE* 9, e114196. doi: 10.1371/journal.pone.0114196
- 642 Takahashi F, Suzuki T, Osakabe Y, Betsuyaku S, Kondo Y, Dohmae N, *et al.* (2018) A small  
643 peptide modulates stomatal control via abscisic acid in long-distance signalling.  
644 *Nature* 556, 235. doi: 10.1038/s41586-018-0009-2
- 645 Tanabe AS (2018) *Claident v0.2.2018.05.29, a software distributed by author at*  
646 <http://www.fifthdimension.jp/>.
- 647 Tanabe AS, Toju H (2013) Two new computational methods for universal DNA barcoding: a  
648 benchmark using barcode sequences of bacteria, archaea, animals, fungi, and land  
649 plants. *PLOS ONE* 8, e76910. doi: 10.1371/journal.pone.0076910
- 650 Tanaka M, Earl AM, Howell HA, Park M-J, Eisen JA, Peterson SN, *et al.* (2004) Analysis of  
651 *Deinococcus radiodurans*'s transcriptional response to ionizing radiation and  
652 desiccation reveals novel proteins that contribute to extreme radioresistance. *Genetics*  
653 168, 21-33. doi: 10.1534/genetics.104.029249
- 654 Toju H, Peay KG, Yamamichi M, Narisawa K, Hiruma K, Naito K, *et al.* (2018) Core  
655 microbiomes for sustainable agroecosystems. *Nat. Plants* 4, 247–257. doi:  
656 10.1038/s41477-018-0139-4
- 657 Toju H, Tanabe A, Ishii H (2016a) Ericaceous plant–fungus network in a harsh alpine–  
658 subalpine environment. *Mol. Ecol.* 25, 3242-3257. doi: 10.1111/mec.13680
- 659 Toju H, Tanabe AS, Yamamoto S, Sato H (2012) High-coverage ITS primers for the  
660 DNA-based identification of ascomycetes and basidiomycetes in environmental  
661 samples. *PLOS ONE* 7, e40863. doi: 10.1371/journal.pone.0040863
- 662 Toju H, Yamamoto S, Tanabe AS, Hayakawa T, Ishii HS (2016b) Network modules and hubs  
663 in plant-root fungal biome. *J. R. Soc. Interface* 13, 20151097. doi:  
664 10.1098/rsif.2015.1097
- 665 van Kan JA, Van den Ackerveken G, De Wit P (1991) Cloning and characterization of cDNA  
666 of avirulence gene *avr9* of the fungal pathogen *Cladosporium fulvum*, causal agent of  
667 tomato leaf mold. *Mol. Plant Microb. Int.* 4, 52-59. doi:
- 668 Vandenkoornhuyse P, Quaiser A, Duhamel M, Le Van A, Dufresne A (2015) The importance



- 669 of the microbiome of the plant holobiont. *New Phytol.* 206, 1196-1206. doi:  
670 10.1111/nph.13312
- 671 Vogel C, Innerebner G, Zingg J, Guder J, Vorholt JA (2012) Forward genetic in planta screen  
672 for identification of plant-protective traits of *Sphingomonas* sp. strain Fr1 against  
673 *Pseudomonas syringae* DC3000. *Appl. Env. Microbiol.* 78, 5529-5535. doi:  
674 10.1128/AEM.00639-12
- 675 Vorholt JA (2012) Microbial life in the phyllosphere. *Nat. Rev. Microbiol.* 10, 828-840. doi:  
676 10.1038/nrmicro2910
- 677 Vorholt JA, Vogel C, Carlstrom CI, Muller DB (2017) Establishing Causality: Opportunities  
678 of Synthetic Communities for Plant Microbiome Research. *Cell Host & Microbe* 22,  
679 142-155. doi: 10.1016/j.chom.2017.07.004
- 680 Wang K, Sipilä T, Overmyer K (2016) The isolation and characterization of resident yeasts  
681 from the phylloplane of *Arabidopsis thaliana*. *Sci. Rep.* 6, 39403. doi:  
682 10.1038/srep39403
- 683 Wang Q-M, Bai F-Y (2008) Molecular phylogeny of basidiomycetous yeasts in the  
684 *Cryptococcus luteolus* lineage (Tremellales) based on nuclear rRNA and  
685 mitochondrial cytochrome b gene sequence analyses: proposal of *Derxomyces* gen.  
686 nov. and *Hannaella* gen. nov., and description of eight novel *Derxomyces* species.  
687 *FEMS yeast research* 8, 799-814. doi: 10.1111/j.1567-1364.2008.00403.x
- 688 Warschefsky EJ, Klein LL, Frank MH, Chitwood DH, Londo JP, von Wettberg EJ, *et al.*  
689 (2016) Rootstocks: diversity, domestication, and impacts on shoot phenotypes. *Trends*  
690 *Plant. Sci.* 21, 418-437. doi: 10.1016/j.tplants.2015.11.008
- 691 Whipps J, Hand P, Pink D, Bending GD (2008) Phyllosphere microbiology with special  
692 reference to diversity and plant genotype. *J. Appl. Microbiol.* 105, 1744-1755. doi:  
693 10.1111/j.1365-2672.2008.03906.x
- 694 Yu X, Lund SP, Scott RA, Greenwald JW, Records AH, Nettleton D, *et al.* (2013)  
695 Transcriptional responses of *Pseudomonas syringae* to growth in epiphytic versus  
696 apoplastic leaf sites. *Proc. Natl. Acad. Sci. USA.* 110, E425-E434. doi:  
697 10.1073/pnas.1221892110  
698

699 **Conflict of Interest Statement:** The authors declare that the research was conducted in the  
700 absence of any commercial or financial relationships that could be constructed as conflict of  
701 interest.  
702

703 **TABLE 1** | Effects of rootstock varieties and spatial positions on the entire microbial  
704 community structure. A PERMANOVA was conducted for each target community  
705 (prokaryotes or fungi) at each taxonomic level (order or genus). The rootstock varieties of  
706 host tomato and spatial positions in the field (location; Fig. 1A) were considered as  
707 explanatory variables.

708

| Taxon       | Taxonomic level | Variable | df | $F_{\text{model}}$ | $R^2$ | $P$    |
|-------------|-----------------|----------|----|--------------------|-------|--------|
| Prokaryotes | Order           | Variety  | 8  | 1.0                | 0.061 | 0.4731 |
|             |                 | Location | 14 | 1.6                | 0.173 | 0.0379 |
|             | Genus           | Variety  | 8  | 1.1                | 0.064 | 0.3733 |
|             |                 | Location | 14 | 2.1                | 0.207 | 0.0035 |
| Fungi       | Order           | Variety  | 8  | 0.6                | 0.033 | 0.7509 |
|             |                 | Location | 14 | 2.2                | 0.213 | 0.0119 |
|             | Genus           | Variety  | 8  | 0.9                | 0.050 | 0.5586 |
|             |                 | Location | 14 | 1.9                | 0.185 | 0.0350 |

709

710

711 **TABLE 2** | Effects of rootstock varieties and spatial positions on the proportion of each  
712 prokaryote genus in the community data. For each prokaryote genus, an ANOVA model of  
713 the mean proportion of sequencing reads was constructed by including the rootstock varieties  
714 of host tomato and spatial positions in the field (location; Fig. 1A) as explanatory variables.  
715 Genera that occurred in 30 or more tomato individuals were subjected to the analysis.

716

| Genus                   | Variety |          |          | Location |          |          |
|-------------------------|---------|----------|----------|----------|----------|----------|
|                         | df      | <i>F</i> | <i>P</i> | df       | <i>F</i> | <i>P</i> |
| <i>Curtobacterium</i>   | 8       | 0.3      | 0.9710   | 14       | 1.1      | 0.3260   |
| <i>Deinococcus</i>      | 8       | 1.8      | 0.0944   | 14       | 1.3      | 0.2386   |
| <i>Hymenobacter</i>     | 8       | 0.5      | 0.8730   | 14       | 1.1      | 0.3900   |
| <i>Kineococcus</i>      | 8       | 0.7      | 0.6710   | 14       | 0.6      | 0.8970   |
| <i>Methylobacterium</i> | 8       | 1.7      | 0.0986   | 14       | 2.0      | 0.0229   |
| <i>Pseudomonas</i>      | 8       | 1.7      | 0.1060   | 14       | 0.6      | 0.8490   |
| <i>Sphingomonas</i>     | 8       | 2.0      | 0.0538   | 14       | 3.2      | 0.0004   |
| <i>Spirosoma</i>        | 8       | 1.0      | 0.4230   | 14       | 1.0      | 0.4310   |

717

718

719 **TABLE 3** | Effects of rootstock varieties and spatial positions on the proportion of each  
 720 fungal genus in the community data. For each fungal genus, an ANOVA model of the mean  
 721 proportion of sequencing reads was constructed by including the rootstock varieties of host  
 722 tomato and spatial positions in the field (location; Fig. 1A) as explanatory variables. Genera  
 723 that occurred in 30 or more tomato individuals were subjected to the analysis.  
 724

| Genus                    | Variety |          |          | Location |          |          |
|--------------------------|---------|----------|----------|----------|----------|----------|
|                          | df      | <i>F</i> | <i>P</i> | df       | <i>F</i> | <i>P</i> |
| <i>Bullera</i>           | 8       | 0.8      | 0.5740   | 14       | 1.0      | 0.4570   |
| <i>Cladosporium</i>      | 8       | 0.7      | 0.6752   | 14       | 2.4      | 0.0051   |
| <i>Cryptococcus</i>      | 8       | 1.1      | 0.3830   | 14       | 1.0      | 0.4620   |
| <i>Curvularia</i>        | 8       | 1.3      | 0.2640   | 14       | 0.8      | 0.6470   |
| <i>Dioszegia</i>         | 8       | 0.4      | 0.9390   | 14       | 1.1      | 0.3670   |
| <i>Hannaella</i>         | 8       | 2.3      | 0.0281   | 14       | 0.8      | 0.7046   |
| <i>Kondoa</i>            | 8       | 1.0      | 0.4730   | 14       | 0.8      | 0.6720   |
| <i>Leptosphaeria</i>     | 8       | 1.1      | 0.3660   | 14       | 1.4      | 0.1820   |
| <i>Moesziomyces</i>      | 8       | 1.5      | 0.1507   | 14       | 1.6      | 0.0833   |
| <i>Nigrospora</i>        | 8       | 0.7      | 0.7050   | 14       | 1.2      | 0.3240   |
| <i>Papiliotrema</i>      | 8       | 1.5      | 0.1720   | 14       | 0.7      | 0.7450   |
| <i>Paraphaeosphaeria</i> | 8       | 0.7      | 0.6570   | 14       | 1.0      | 0.4990   |
| <i>Pseudozyma</i>        | 8       | 0.5      | 0.8690   | 14       | 0.5      | 0.9500   |
| <i>Saitozyma</i>         | 8       | 0.2      | 0.9800   | 14       | 1.1      | 0.3890   |
| <i>Sporobolomyces</i>    | 8       | 0.5      | 0.8504   | 14       | 1.8      | 0.0475   |

725

1 **TABLE 4** | Prokaryote and fungal OTUs showing statistically significant preferences for tomato rootstock varieties.

2

| OTU         | Preferred variety           | Phylum              | Class           | Order         | Family             | Genus              | NCBI Blast top hit       | Accession | Cover | Identity |
|-------------|-----------------------------|---------------------|-----------------|---------------|--------------------|--------------------|--------------------------|-----------|-------|----------|
| Prokaryotes |                             |                     |                 |               |                    |                    |                          |           |       |          |
| P_040       | Ungrafted ( $P = 0.00321$ ) | Deinococcus-Thermus | Deinococci      | Deinococcales | Deinococcaceae     | <i>Deinococcus</i> | <i>Deinococcus citri</i> | LT602922  | 100%  | 100%     |
| Fungi       |                             |                     |                 |               |                    |                    |                          |           |       |          |
| F_427       | Ganbarune ( $P = 0.00078$ ) | Basidiomycota       | Tremellomycetes | Tremellales   | Bulleribasidiaceae | <i>Hannaella</i>   | <i>Hannaella oryzae</i>  | KY103504  | 89%   | 99%      |
| F_428       | Ganbarune ( $P = 0.00099$ ) | Basidiomycota       | Tremellomycetes | Tremellales   | Bulleribasidiaceae | <i>Hannaella</i>   | <i>Hannaella oryzae</i>  | KY103504  | 89%   | 99%      |

3

## 1 **FIGURE LEGENDS**

2

3 **FIGURE 1.** Field site. **(A)** Nine tomato rootstock varieties (treatments) in the field. For each  
4 rootstock variety, 15 replicate samples were transplanted to the field site (15 replicates  $\times$  9  
5 varieties = 135 tomato individuals). The above-ground parts of all the 135 tomato individuals  
6 had the genotype of the tomato variety “Momotaro-Haruka”. **(B)** Transplanted tomato  
7 individuals.

8

9 **FIGURE 2.** Structure of the phyllosphere microbial communities. The phyllosphere  
10 microbial community compositions were compared among tomato individuals with different  
11 rootstock genotypes. **(A)** Order-level community structure of prokaryotes. **(B)** Genus-level  
12 community structure of prokaryotes. **(C)** Order-level community structure of fungi. **(D)**  
13 Genus-level community structure of fungi.

14

15 **FIGURE 3.** Randomization analysis of preferences for rootstock varieties. An asterisk  
16 indicates significant preference index score in a combination of a microbial genus and a host  
17 rootstock variety (Bonferroni correction applied to each genus;  $\alpha = 0.05$ ). **(A)** Prokaryote  
18 genera. **(B)** Fungal genera.

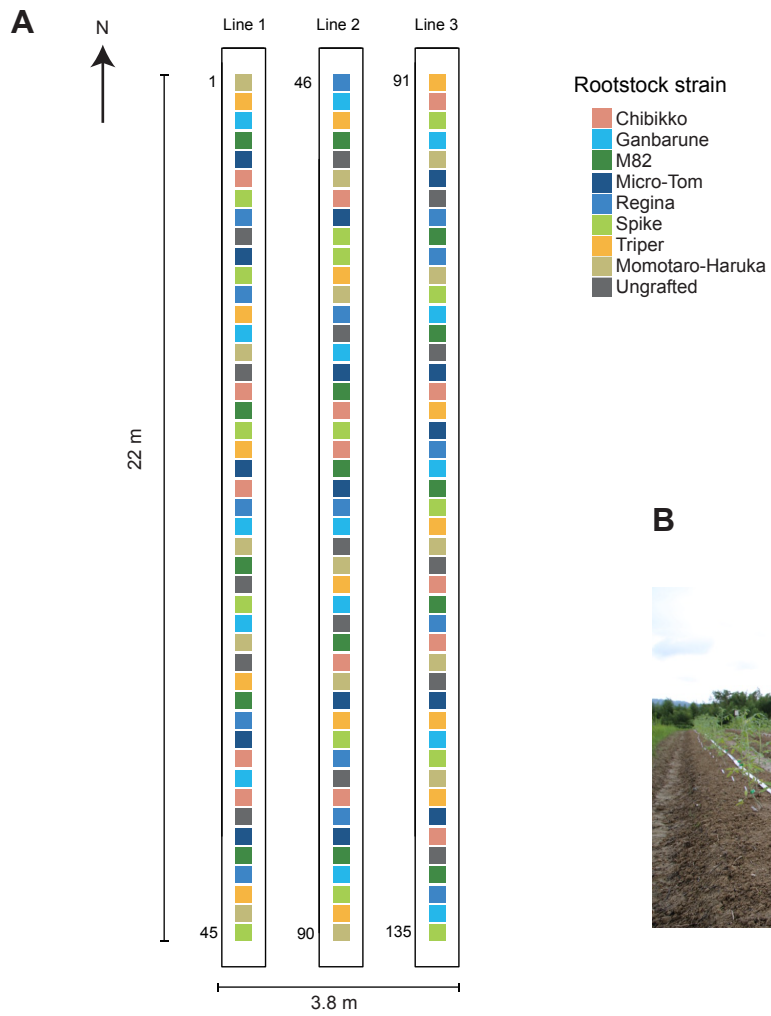

**B**

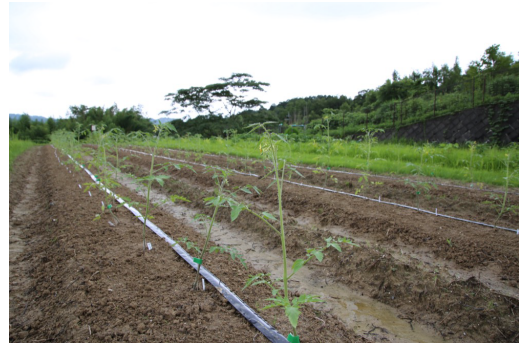



### A. Prokaryota (order)

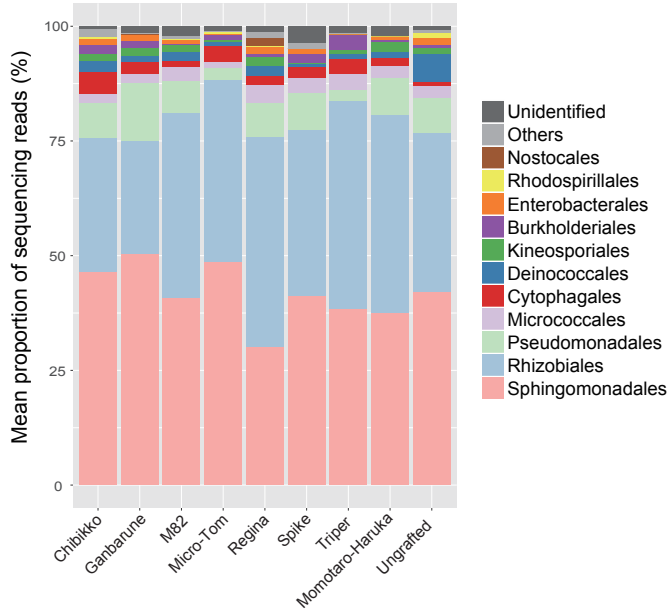

### B. Prokaryota (genus)

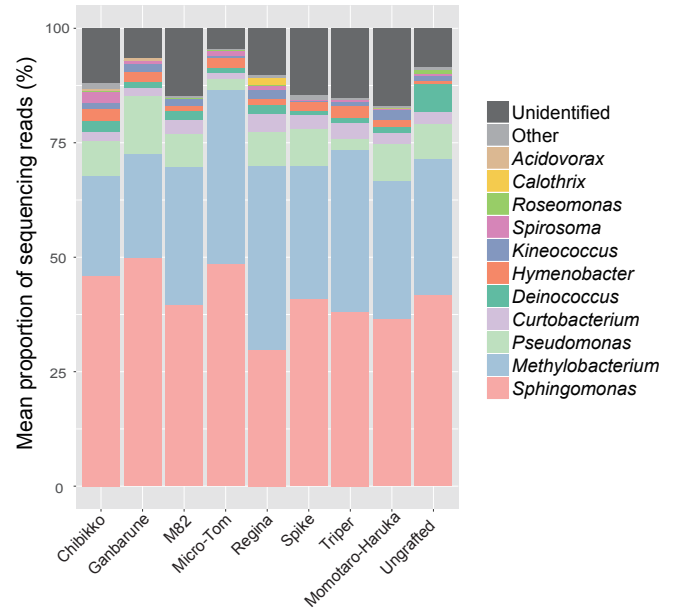

### C. Fungi (order)

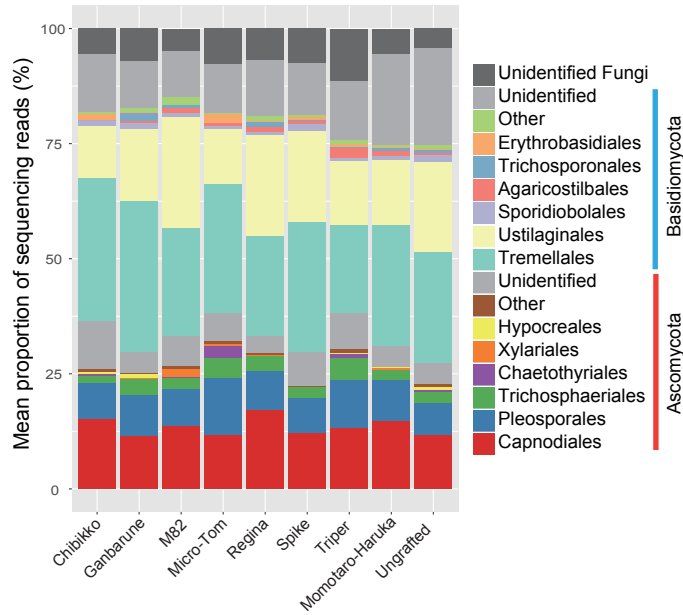

### D. Fungi (genus)

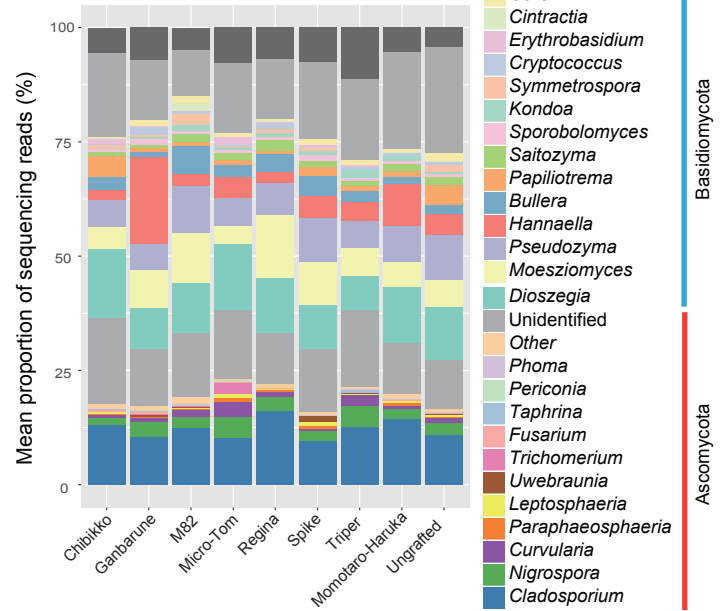

Source: http://biorxiv.org/content/10.1101/365023v1.full.pdf
